# Supplementary material for: Modified Mycotoxins, a Still Unresolved Issue
Source: MDPI journal article supplement (doi:10.3390/chemistry4040099), 2022-11-09
Supplement: s1 [file s1]

Table S1. Analysis of Modified mycotoxins

| Matrices                                                | Analytical method           | Modified mycotoxin                                                                                                                                                                          | Reference                              |
|---------------------------------------------------------|-----------------------------|---------------------------------------------------------------------------------------------------------------------------------------------------------------------------------------------|----------------------------------------|
| Wheat                                                   | GC-MS, HPLC-MS              | DON3G                                                                                                                                                                                       | Simsek 2013                            |
|                                                         | HPLC-MS                     | DON3G, DON-di-hexoside, 15A-DON3G, DON-malonylglucoside; DON-S-glutathione, “DON-2H”-S-glutathione, DON-S-cysteinyl-glycine, DON-S-cysteine                                                 | Kluger 2014                            |
|                                                         |                             | ZEA 4-β-D-glucopyranoside                                                                                                                                                                   | Schneweis 2002                         |
|                                                         | LC-MS/MS                    | ZEA4G, A-DON, DON3G                                                                                                                                                                         | Galaverna 2009                         |
|                                                         | FPIA                        | T-2 glucoside and HT-2 glucoside                                                                                                                                                            | Lippolis 2019                          |
| Wheat, maize                                            | HPLC FLD                    | ZEA 4-β-D-glucopyranoside                                                                                                                                                                   | Gareis, 1990                           |
|                                                         | LC-MS/MS                    | DON3G; 3A-DON; 15A-DON; DON3S, DON15S DON-hexitol, DON-di-hexoside, 15A-DON3G, DON-glutathione derivative                                                                                   | Berthiller 2005; Berthiller 2016       |
| Maize                                                   | HPLC-ESI-TQ-MS/MS           | DON3G, 3A-DON, 15A-DON, enniatins A, A1, B, B1                                                                                                                                              | Scarpino 2019                          |
|                                                         | HPLC FLD                    | 15A-DON                                                                                                                                                                                     | Abbas 1986                             |
|                                                         | GC-ITMS                     | 3A-DON; 15A-DON                                                                                                                                                                             | Schollenberger 2008                    |
|                                                         | UPLC-MS/MS                  | DON3G; 3A-DON; 15A-DON                                                                                                                                                                      | Zhang 2022                             |
|                                                         | UPLC-ESI/MS<br>LC-MS/MS     | Hidden fumonisin                                                                                                                                                                            | Falavigna 2012; Bryła 2015; Bryła 2016 |
| Gluten-free maize flour                                 | LC-MS/MS                    |                                                                                                                                                                                             | Bryła 2014                             |
| Maize, pasta, bread, cakes, crisps, flour               | LC-MS/MS; HPLC-FLD; HPLC-MS |                                                                                                                                                                                             | Dall’Asta 2008; Kim 2003; Park 2004    |
| Tomato, potato, maize, carrots, wheat, soybean, paprika | HPLC FLD                    | 4R)- and (4S)-4-hydroxy-OTA; their β-glucosides                                                                                                                                             | Ruhland 1997                           |
| Baby formula, rice                                      | LC-UVVIS                    | DON-3G, nivalenol-3-glucoside                                                                                                                                                               | Lee 2019                               |
| Barley                                                  | LCMS/MS, NMR                | DON-GSH derivatives                                                                                                                                                                         | Gardiner 2010                          |
| Urine pigs, mice, cows                                  | UPLC-ESI/MS<br>LC-MS/MS     | iso-DON-8-GlcAc; DON-GlcAc; iso-DOM-8-GlcAc; DOM-GlcAc; DON-8,15-hemiketal-8-glucuronide; DON-3-GlcAc; DON-15-GlcAc; iso-DON-3-GlcAc; DOM-GlcAc; DOM-3-GlcAc; DOM-15-GlcAc; iso-DOM-3-GlcAc | Schwartz-Zimmermann 2017               |
| Pigs feces and urine                                    | LC-MSMS                     | DON3G                                                                                                                                                                                       | Nagl 2014                              |
|                                                         | HPLC FLD                    | ZEA 4-β-D-glucopyranoside                                                                                                                                                                   | Gareis, 1990                           |
| Rats feces and urine                                    | LC-MSMS                     | DON3G                                                                                                                                                                                       | Nagl 2012                              |
| Rat urine                                               | LC-UV; LCMS                 | 4(R)- and (4S)-4-hydroxy-OTA                                                                                                                                                                | Storen 1982                            |
|                                                         | (IAC)-HPLC                  | DON-glucuronide                                                                                                                                                                             | Meky 2003                              |
| Human urine                                             | LC-MS/MS                    | ZEA metabolites                                                                                                                                                                             | Ali 2018                               |
|                                                         |                             | modified DON and ZEA                                                                                                                                                                        | Solfrizzo 2014                         |
| Human microbioma                                        | LC-MSMS                     | DON3G, ZEA14G, ZEA14S                                                                                                                                                                       | Dall’Erta 2013                         |
| Liquid fungal culture                                   | HPLC-MS/MS                  | ZEA-14-sulfate; ZEA-O-14-glucoside; ZEA-O-16-glucoside                                                                                                                                      | Brodehl 2014                           |
|                                                         |                             | T-2-3α-glucoside; HT-2-3-glucoside                                                                                                                                                          | Schmidt 2018                           |
| Liver microsomes                                        | LCQTOF-MS                   | 4(R)-HO-OTA; 4(S)-HO-OTA; 9’-HO-OTA; 7’-HO-OTA; 5’-HOOTA; OTB                                                                                                                               | Yang 2015                              |

|                                  |                           |
|----------------------------------|---------------------------|
| human breast cancer cell culture | Fluorescence spectroscopy |
| $\beta$ -CD bead polymer         |                           |

ZEN-14-Glc

|                 |
|-----------------|
| Dellafiora 2016 |
|-----------------|

|             |
|-------------|
| Faisal 2019 |
|-------------|
